# Supplementary material
Source: PubMed Central journal article supplement (PMC5903877)

**Note to readers with disabilities:** *EHP* strives to ensure that all journal content is accessible to all readers. However, some figures and Supplemental Material published in *EHP* articles may not conform to [508 standards](#) due to the complexity of the information being presented. If you need assistance accessing journal content, please contact [ehp508@niehs.nih.gov](mailto:ehp508@niehs.nih.gov). Our staff will work with you to assess and meet your accessibility needs within 3 working days.

### **Supplemental Material**

#### **Estimated changes in life expectancy and adult mortality resulting from declining PM<sub>2.5</sub> exposures in the contiguous United States: 1980–2010**

Neal Fann, Sun-Young Kim, Casey Olives, Lianne Sheppard

#### **Table of Contents**

**Table S1.** Means and standard deviations of estimated state-specific fractions (%) of PM<sub>2.5</sub>-attributable deaths in adults across quintiles in 1980, 1990, 2000, and 2010

**Figure S1.** Estimated change in population-scaled PM<sub>2.5</sub> concentrations ( $\Delta$  PM<sub>2.5</sub> \* county-level population) between 1980–2010. State and County boundaries for each year drawn according to Census Topologically Integrated Geographic Encoding and Referencing (TIGER)/Line files as reported by the Minnesota Population Center National Historical Geographic Information System (<http://www.nhgis.org>)

**Figure S2.** Estimated change in the percentage of deaths attributed to PM<sub>2.5</sub> in 2010 compared with 1980. State and County boundaries for each year drawn according to Census Topologically Integrated Geographic Encoding and Referencing (TIGER)/Line files as reported by the Minnesota Population Center National Historical Geographic Information System (<http://www.nhgis.org>)

**Supplement to Estimated changes in life expectancy and adult mortality resulting from declining PM<sub>2.5</sub> exposures in the contiguous United States: 1980–2010**

---

**Table S1. Means and standard deviations of estimated state-specific fractions (%) of PM<sub>2.5</sub>-attributable deaths in adults across quintiles in 1980, 1990, 2000, and 2010**

| Quintile | Year  |      |      |      |      |      |      |      |
|----------|-------|------|------|------|------|------|------|------|
|          | 1980  |      | 1990 |      | 2000 |      | 2010 |      |
|          | Mean  | SD   | Mean | SD   | Mean | SD   | Mean | SD   |
| 1        | 4.96  | 0.66 | 5.21 | 0.71 | 3.25 | 0.48 | 2.96 | 0.38 |
| 2        | 6.89  | 0.81 | 6.66 | 0.29 | 4.70 | 0.35 | 4.07 | 0.31 |
| 3        | 8.40  | 0.36 | 7.77 | 0.47 | 5.64 | 0.44 | 4.75 | 0.15 |
| 4        | 9.34  | 0.14 | 8.69 | 0.22 | 7.04 | 0.26 | 5.32 | 0.17 |
| 5        | 10.14 | 0.51 | 9.29 | 0.24 | 7.81 | 0.43 | 5.98 | 0.30 |

**Figure S1.** Estimated change in population-scaled PM<sub>2.5</sub> concentrations ( $\Delta$  PM<sub>2.5</sub> \* county-level population) between 1980–2010. State and County boundaries for each year drawn according to Census Topologically Integrated Geographic Encoding and Referencing (TIGER)/Line files as reported by the Minnesota Population Center National Historical Geographic Information System (<http://www.nhgis.org>)

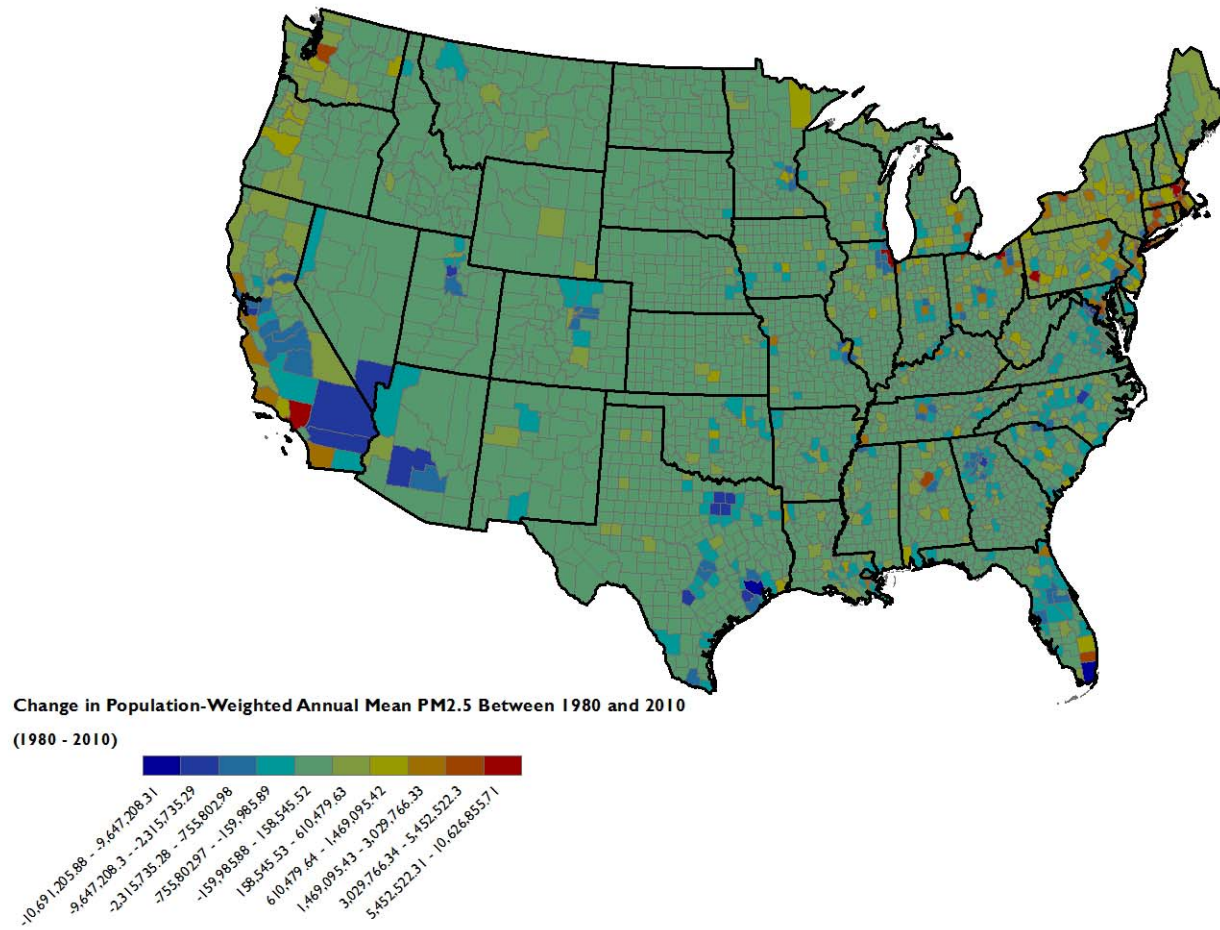

**Supplement Figure S2.** Estimated change in the percentage of deaths attributed to PM2.5 in 2010 compared with 1980. State and County boundaries for each year drawn according to Census Topologically Integrated Geographic Encoding and Referencing (TIGER)/Line files as reported by the Minnesota Population Center National Historical Geographic Information System (<http://www.nhgis.org>)

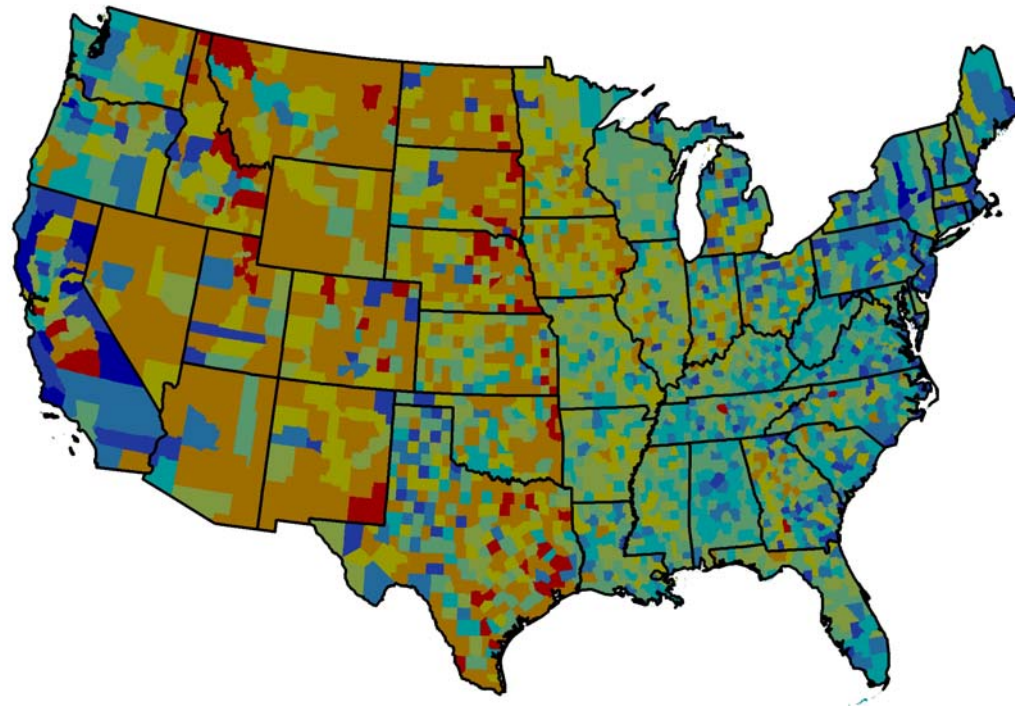

**Change in the Percentage of Deaths Due to PM2.5 Between 1980 and 2010**

(1980 - 2010)

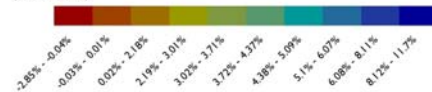

Supplement: EHP507.s001.acco.pdf [file EHP507.s001.acco.pdf]
